# Supplementary material
Source: MDPI journal article supplement (https://www.mdpi.com/1424-8247/17/4/433)
Supplement: s1 [file s1]

# Supplementary materials

of

## Exploring Immersion Coating as a Cost-Effective Method for Small-Scale Production of Enteric-Coated Gelatin Capsules

Beatrice Sabbatini, Diego Romano Perinelli, Giovanni Filippo Palmieri, Marco Cespi \*  
and Giulia Bonacucina

School of Pharmacy, University of Camerino, Camerino 62032, Italy;  
beatrice.sabbatini@unicam.it (B.S.); diego.perinelli@unicam.it (D.R.P.);  
gianfilippo.palmieri@unicam.it (G.F.P.); giulia.bonacucina@unicam.it (G.B.)  
\* Correspondence: marco.cespi@unicam.it

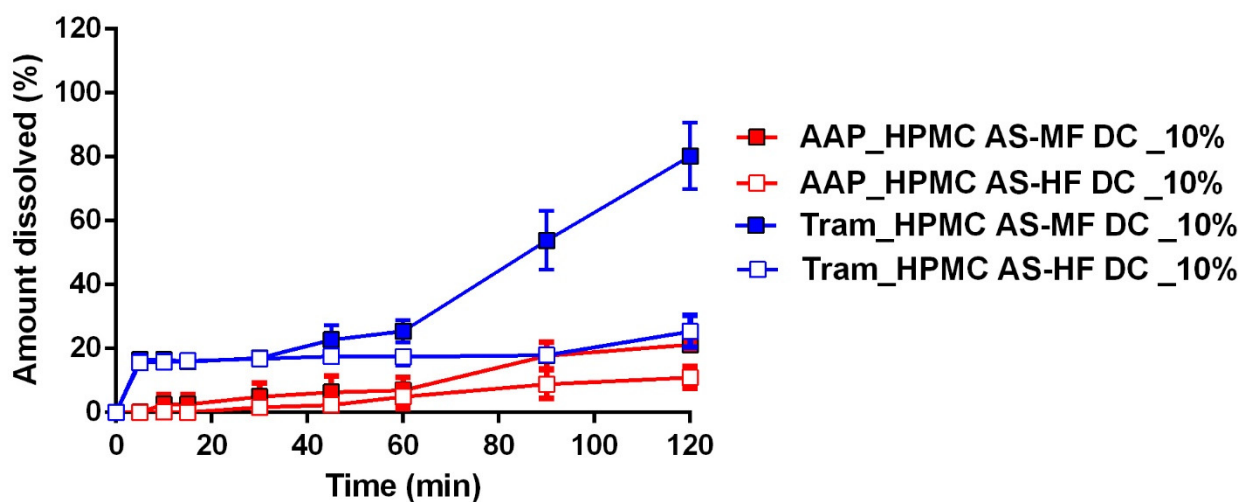

**Figure S1.** Release profiles of capsules containing AAP or Tram double coated (DC) with HPMC AS-MF and HPMC AS-HF.

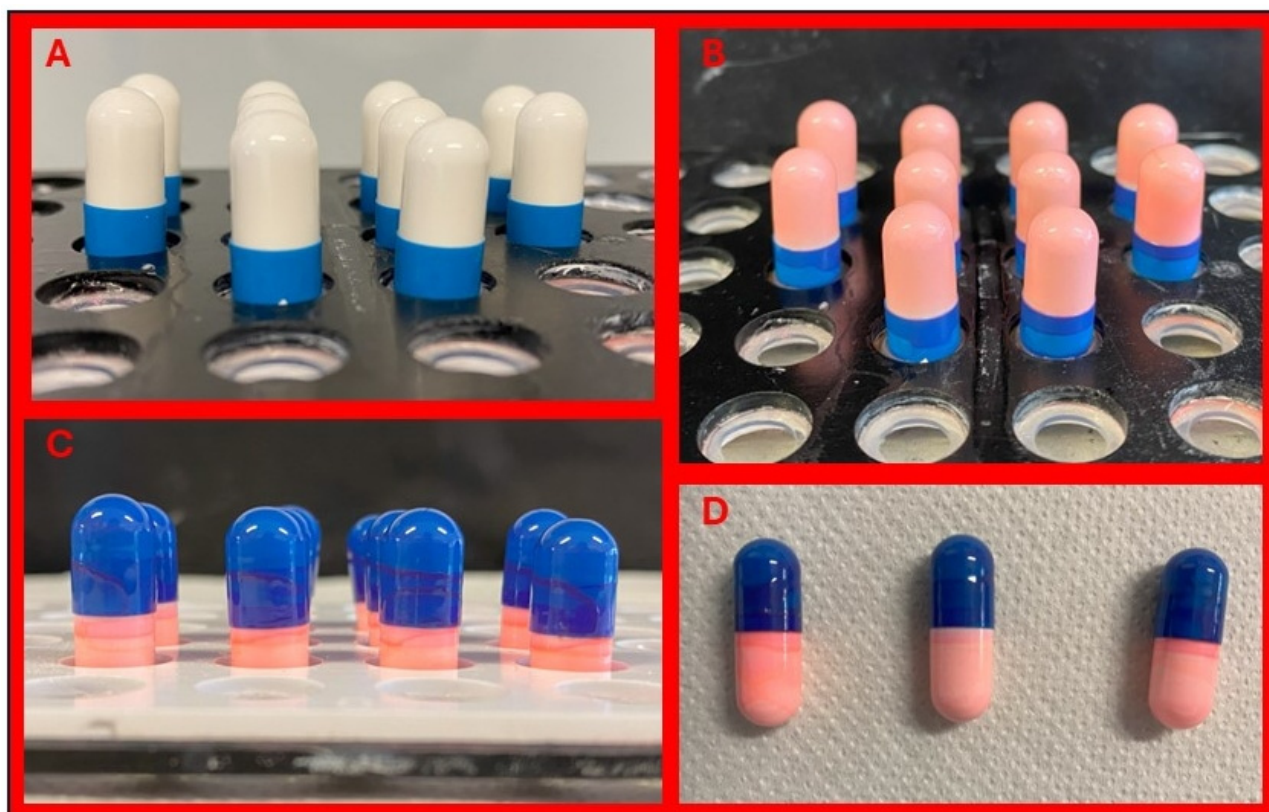

**Figure S2.** Images of capsule before, during and after the coating process. A) un-coated capsules; B) Capsules after the first step of coating and drying (coating of the lower half, that is the body and part of the cap); C) Capsules after the second step of coating and drying (coating of the higher half, that is the cap and part of the body); D) Coated capsules removed from the holder.

**Table S1.** Capsule content for each type of type of enteric capsule system tested.

| Tested capsules               | Capsules content |                     |
|-------------------------------|------------------|---------------------|
|                               | API (35 mg)      | Excipients (225 mg) |
| Un-coated capsules            | AAP              | SMCC                |
| Un-coated capsules            | Tram             | SMCC                |
| AAP_EuS100                    | AAP              | SMCC                |
| Tram_EuS100                   | Tram             | SMCC                |
| AAP_EuL100                    | AAP              | SMCC                |
| Tram_EuL100                   | Tram             | SMCC                |
| AAP_HPMC AS-MF                | AAP              | SMCC                |
| Tram_HPMC AS-MF               | Tram             | SMCC                |
| AAP_HPMC AS-HF                | AAP              | SMCC                |
| Tram_HPMC AS-HF               | Tram             | SMCC                |
| AAP in DRcaps®                | AAP              | SMCC                |
| Tram in DRcaps®               | Tram             | SMCC                |
| AAP in DRcaps®/ DRcaps®       | AAP              | SMCC                |
| Tram in DRcaps®/ DRcaps®      | Tram             | SMCC                |
| AAP in gelatin caps/ DRcaps®  | AAP              | SMCC                |
| Tram in gelatin caps/ DRcaps® | Tram             | SMCC                |
| Vcaps AAP_Lac                 | AAP              | LAC                 |
| Vcaps Tram_Lac                | Tram             | LAC                 |
| Vcaps AAP_SMCC                | AAP              | SMCC                |
| Vcaps Tram_SMCC               | Tram             | SMCC                |
| Vcaps AAP_DCP                 | AAP              | DCP                 |
| Vcaps Tram_DCP                | Tram             | DCP                 |
